# Supplementary material for: Expression profiling of single cells and patient cohorts identifies multiple immunosuppressive pathways and an altered NK cell phenotype in glioblastoma
Source: PubMed Central journal article supplement (PMC7066386; doi:10.1111/cei.13403), 2019-12-16
Supplement: CEI-200-33-s007.pdf [file CEI-200-33-s007.pdf]

Supplementary Table 1

## GBM4

| CD  | %Gated |
|-----|--------|
| 9   | 99.96  |
| 15  | 28.24  |
| 24  | 99.67  |
| 26  | 45.72  |
| 29  | 94.81  |
| 34  | 54.75  |
| 44  | 97.35  |
| 46  | 99.98  |
| 47  | 100    |
| 54  | 73.14  |
| 55  | 73.42  |
| 56  | 69.62  |
| 57  | 98.98  |
| 59  | 99.98  |
| 61  | 31.87  |
| 63  | 99.92  |
| 71  | 99.75  |
| 73  | 60.17  |
| 81  | 99.8   |
| 90  | 64.35  |
| 91  | 90.62  |
| 94  | 92.85  |
| 95  | 97.53  |
| 97  | 99.99  |
| 98  | 100    |
| 99  | 99.99  |
| 105 | 98.24  |
| 109 | 20.36  |
| 112 | 79.71  |
| 118 | 36.06  |
| 119 | 98.89  |
| 130 | 91.14  |
| 141 | 86     |
| 142 | 92     |
| 146 | 94.54  |
| 147 | 100    |
| 151 | 99.86  |
| 152 | 27.17  |
| 164 | 98.76  |
| 165 | 99.92  |
| 166 | 98.03  |
| 184 | 61.1   |
| 200 | 95.55  |
| 209 | 26.39  |
| 220 | 50.1   |

## GBM11

| CD  | %Gated |
|-----|--------|
| 9   | 100    |
| 10  | 48.99  |
| 26  | 70.04  |
| 29  | 39.52  |
| 34  | 99.26  |
| 38  | 36.44  |
| 40  | 34.05  |
| 44  | 100    |
| 46  | 100    |
| 47  | 99.99  |
| 54  | 99.41  |
| 55  | 98.61  |
| 56  | 99.75  |
| 57  | 88.91  |
| 59  | 100    |
| 61  | 91.58  |
| 63  | 99.96  |
| 71  | 99.99  |
| 73  | 99.98  |
| 74  | 95.29  |
| 77  | 85.22  |
| 80  | 28.97  |
| 81  | 99.84  |
| 90  | 30.33  |
| 91  | 99.32  |
| 94  | 75.71  |
| 95  | 98.11  |
| 97  | 99.98  |
| 98  | 100    |
| 99  | 99.86  |
| 104 | 98.99  |
| 105 | 48.77  |
| 106 | 98.22  |
| 109 | 29.73  |
| 112 | 32.23  |
| 119 | 99.06  |
| 130 | 56.11  |
| 141 | 61.41  |
| 142 | 78.23  |
| 146 | 96.73  |
| 147 | 99.99  |
| 151 | 88.73  |
| 164 | 99.98  |
| 165 | 99.67  |
| 166 | 99.68  |

## GBM13

| CD  | %Gated |
|-----|--------|
| 9   | 100    |
| 24  | 78.56  |
| 26  | 70.49  |
| 29  | 91.72  |
| 34  | 55.04  |
| 44  | 100    |
| 46  | 100    |
| 47  | 99.98  |
| 50  | 21.35  |
| 54  | 94.73  |
| 55  | 100    |
| 56  | 99.56  |
| 57  | 96.16  |
| 59  | 99.95  |
| 61  | 84.77  |
| 63  | 99.92  |
| 71  | 99.55  |
| 73  | 99.97  |
| 77  | 64.76  |
| 80  | 25.44  |
| 81  | 99.83  |
| 90  | 99.06  |
| 91  | 99.25  |
| 94  | 97.98  |
| 95  | 99.76  |
| 97  | 100    |
| 98  | 100    |
| 99  | 99.99  |
| 104 | 70.65  |
| 105 | 88.5   |
| 108 | 65.92  |
| 112 | 71.2   |
| 118 | 44.6   |
| 119 | 98.85  |
| 130 | 93.38  |
| 141 | 98.98  |
| 142 | 99.19  |
| 144 | 41.24  |
| 146 | 98.83  |
| 147 | 99.99  |
| 151 | 99.89  |
| 152 | 37.74  |
| 164 | 96.08  |
| 165 | 99.98  |
| 166 | 99.47  |

|         |       |          |       |         |       |
|---------|-------|----------|-------|---------|-------|
| 221     | 88.91 | 184      | 43.79 | 184     | 56.94 |
| 227     | 55.26 | 201      | 40.7  | 200     | 98.67 |
| 268     | 46.26 | 205      | 99.62 | 209     | 61.79 |
| 271     | 93.53 | 221      | 37.27 | 220     | 81.34 |
| 274     | 20.2  | 227      | 95.48 | 221     | 78.72 |
| 338     | 21.76 | 268      | 41.13 | 227     | 62.9  |
| 340     | 94.98 | 271      | 98.13 | 268     | 50.41 |
| 107A    | 73.59 | 273      | 81.29 | 271     | 99.87 |
| 107B    | 38.39 | 274      | 97.28 | 274     | 75.63 |
| 120A    | 47.52 | 321      | 20.37 | 321     | 84.49 |
| 140A    | 50.48 | 338      | 38.87 | 329     | 34.7  |
| 140B    | 55.76 | 340      | 86.48 | 338     | 38.32 |
| 172B    | 75.75 | 107A     | 99.4  | 340     | 97.36 |
| 49b     | 99.99 | 107B     | 98.22 | 107A    | 88.26 |
| 49c     | 83.81 | 120A     | 93.31 | 107B    | 54.28 |
| 49d     | 51.39 | 121B     | 23.32 | 120A    | 71.32 |
| 49e     | 88.34 | 140A     | 23.9  | 140B    | 37.51 |
| 49f     | 98.52 | 172B     | 34.05 | 172B    | 89.85 |
| 51/61   | 55.64 | 49b      | 99.97 | 49a     | 35.63 |
| 99R     | 92.65 | 49c      | 100   | 49b     | 99.98 |
| b2m     | 99.81 | 49d      | 96.86 | 49c     | 100   |
| egfr    | 31.04 | 49e      | 100   | 49d     | 23.75 |
| GD2     | 92.33 | 49f      | 99.67 | 49e     | 99.93 |
| HLA ABC | 99.97 | 51/61    | 96.93 | 49f     | 99.77 |
| HLA DQ  | 93.52 | 62P      | 20.62 | 51/61   | 93.03 |
| HLAA2   | 97.18 | 99R      | 88.77 | 99R     | 99.45 |
| MICA/B  | 40.37 | b2m      | 99.96 | b2m     | 99.94 |
| SSEA1   | 31.86 | GD2      | 99.94 | CD326   | 63.61 |
|         |       | HLA ABC  | 99.97 | egfr    | 53.2  |
|         |       | HLA DQ   | 99.46 | GD2     | 99.96 |
|         |       | HLA DR   | 99.98 | HLA ABC | 99.99 |
|         |       | HLA DRPQ | 99.95 | HLA DQ  | 99.72 |
|         |       |          |       | HLAA2   | 99.22 |
|         |       |          |       | MICA/B  | 43.86 |
|         |       |          |       | SSEA4   | 32.18 |

| GBM1 |        | GBM20 |        |
|------|--------|-------|--------|
| CD   | %Gated | CD    | %Gated |
| 9    | 26.7   | 9     | 99.97  |
| 15   | 36.8   | 15    | 67.12  |
| 26   | 32     | 24    | 89.22  |
| 29   | 62     | 26    | 55.02  |
| 34   | 3.8    | 29    | 65.05  |
| 44   | 71.6   | 34    | 56.14  |
| 46   | 89.3   | 44    | 99.84  |
| 47   | 91.6   | 46    | 99.98  |
| 54   | 23.6   | 47    | 100    |
| 56   | 82.7   | 50    | 31.08  |
| 57   | 71.3   | 54    | 38.51  |
| 58   | 77.2   | 55    | 34.17  |
| 58   | 77.2   | 56    | 99.75  |
| 59   | 80.9   | 57    | 99.75  |
| 63   | 83.2   | 58    | 100    |
| 71   | 87.1   | 59    | 99.92  |
| 73   | 37.9   | 61    | 88.07  |
| 81   | 89.8   | 63    | 99.95  |
| 90   | 81.3   | 71    | 99.64  |
| 91   | 57.7   | 73    | 99.87  |
| 94   | 70.5   | 74    | 37.5   |
| 95   | 73.8   | 75    | 22.84  |
| 97   | 86     | 77    | 65.45  |
| 98   | 75.6   | 80    | 57.11  |
| 99   | 87.2   | 81    | 100    |
| 106  | 25.6   | 88    | 47.35  |
| 119  | 75.1   | 90    | 99.04  |
| 142  | 82.6   | 91    | 94.09  |
| 146  | 83.3   | 94    | 89.63  |
| 147  | 90.9   | 95    | 96.69  |
| 151  | 89     | 97    | 99.97  |
| 164  | 76.7   | 98    | 100    |
| 165  | 87.8   | 99    | 99.99  |
| 166  | 87.3   | 105   | 74.88  |
| 200  | 70.6   | 106   | 45.03  |
| 227  | 50.5   | 108   | 75.15  |
| 271  | 53.4   | 112   | 55.1   |
| 321  | 21.5   | 118   | 20.41  |
| 340  | 26.8   | 119   | 98.14  |
| 107a | 41.4   | 130   | 98.03  |
| 140a | 28.2   | 138   | 47.21  |
| 49a  | 34.9   | 141   | 94.31  |
| 49b  | 89.1   | 142   | 97.51  |
| 49c  | 29.2   | 146   | 96.92  |
| 49d  | 31     | 147   | 100    |
| 49e  | 68.6   | 151   | 99.98  |

|         |      |          |       |
|---------|------|----------|-------|
| 49f     | 63.8 | 152      | 75.76 |
| 99r     | 36.7 | 164      | 97.38 |
| b2m     | 83.8 | 165      | 99.97 |
| gd2     | 53.8 | 166      | 94.15 |
| HLA ABC | 90.8 | 171      | 36.09 |
| HLA DQ  | 40.3 | 184      | 47.56 |
| ssea1   | 58.9 | 200      | 98.92 |
|         |      | 205      | 20.88 |
|         |      | 209      | 47.54 |
|         |      | 220      | 81.45 |
|         |      | 221      | 58    |
|         |      | 227      | 91.57 |
|         |      | 231      | 21.87 |
|         |      | 268      | 73.6  |
|         |      | 271      | 98.5  |
|         |      | 273      | 34.4  |
|         |      | 274      | 72.22 |
|         |      | 321      | 42.19 |
|         |      | 338      | 90.98 |
|         |      | 340      | 79.74 |
|         |      | 107A     | 78.66 |
|         |      | 107B     | 71.14 |
|         |      | 120A     | 69.01 |
|         |      | 120B     | 41.99 |
|         |      | 140A     | 26.31 |
|         |      | 140B     | 66.96 |
|         |      | 172B     | 70.02 |
|         |      | 49b      | 99.33 |
|         |      | 49c      | 99.96 |
|         |      | 49d      | 82.31 |
|         |      | 49e      | 99.83 |
|         |      | 49f      | 93.66 |
|         |      | 51/61    | 94.17 |
|         |      | 99R      | 97.86 |
|         |      | b2m      | 100   |
|         |      | egfr     | 68.68 |
|         |      | GD2      | 99.82 |
|         |      | HLA ABC  | 99.95 |
|         |      | HLA DQ   | 98.28 |
|         |      | HLA DR   | 96.45 |
|         |      | HLA DRPQ | 95.51 |
|         |      | HLAA2    | 99.94 |
|         |      | MICA/B   | 77.53 |
|         |      | SSEA1    | 66.06 |

Full list of antigen screened can be found  
<http://www.bdbiosciences.com/ds/pm/others/23-10930.pdf>  
 Data shows percentage expressed of each antigen (CD).
